# Supplementary material for: Vertical sleeve gastrectomy induces enteroendocrine cell differentiation of intestinal stem cells through bile acid signaling
Source: PubMed Central journal article supplement (PMC9220851; doi:10.1172/jci.insight.154302), 2022-06-08
Supplement: jciinsight-7-154302-s036.pdf [file jciinsight-7-154302-s036.pdf]

## Supplementary Material

Supplementary Figure 1.

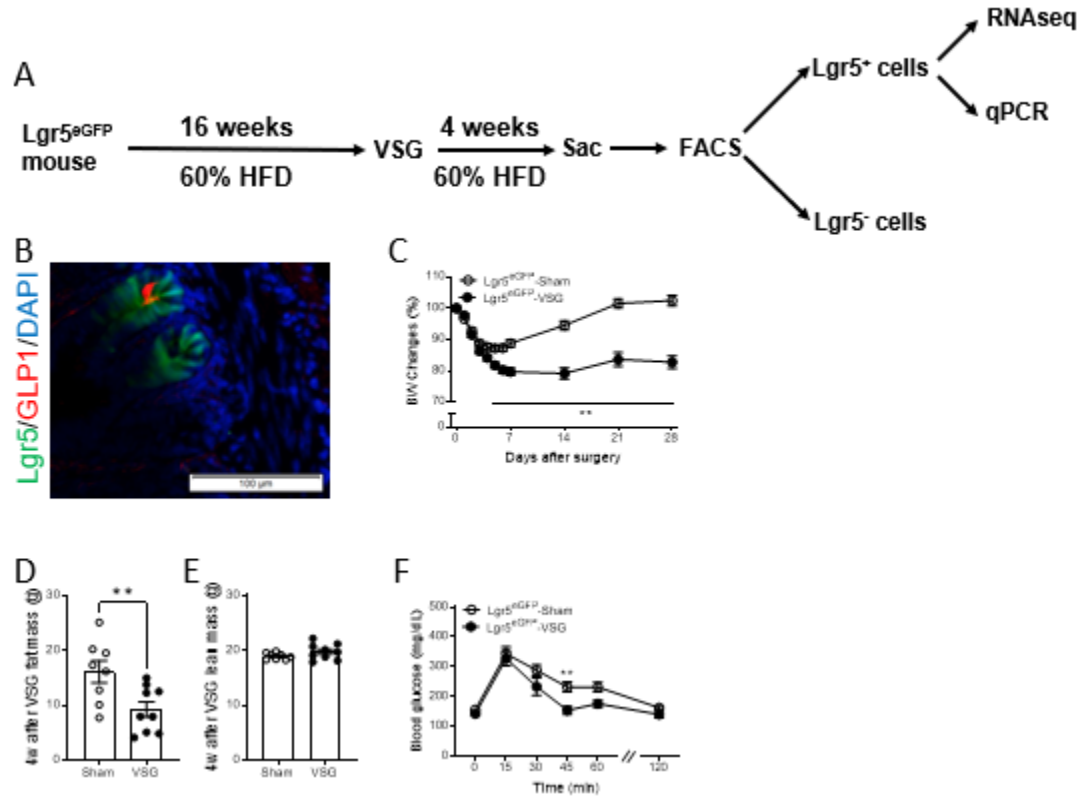

**Fig. S1.** Lgr5eGFP mice VSG phenotype. (A) Schematic experimental timeline. (B) Representative immunofluorescence image of the crypt of the Lgr5eGFP mice jejunum (bar = 100  $\mu$ m). (C-E) BW change (C), fat mass (D), and lean mass (E) in sham or VSG-treated Lgr5eGFP mice. (F) Oral glucose tolerance (2 g/Kg) of sham or VSG mice. Mean  $\pm$  SEM. Statistics, t-test or ANOVA. \*\*P<0.01, n=8-9.

Supplementary Figure 2.

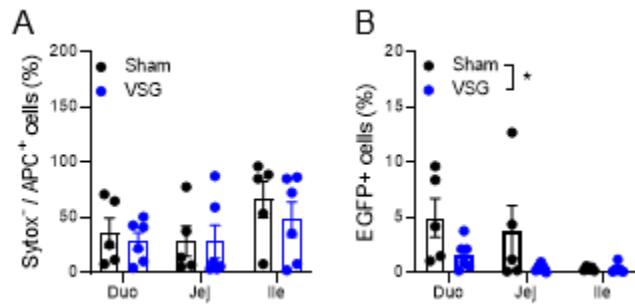

**Fig. S2.** Lgr5eGFP mice VSG-FACS results. (A) Pre-sorted Sytox<sup>-</sup> and APC<sup>+</sup> intestinal epithelial cells (%) of the sham or VSG-treated Lgr5eGFP mice. (B) EGFP<sup>+</sup> intestinal epithelial cells (%) of the sham or VSG-treated Lgr5eGFP mice. Main effect of surgery. \* P<0.05, n=5-6.

Supplementary Figure 3.

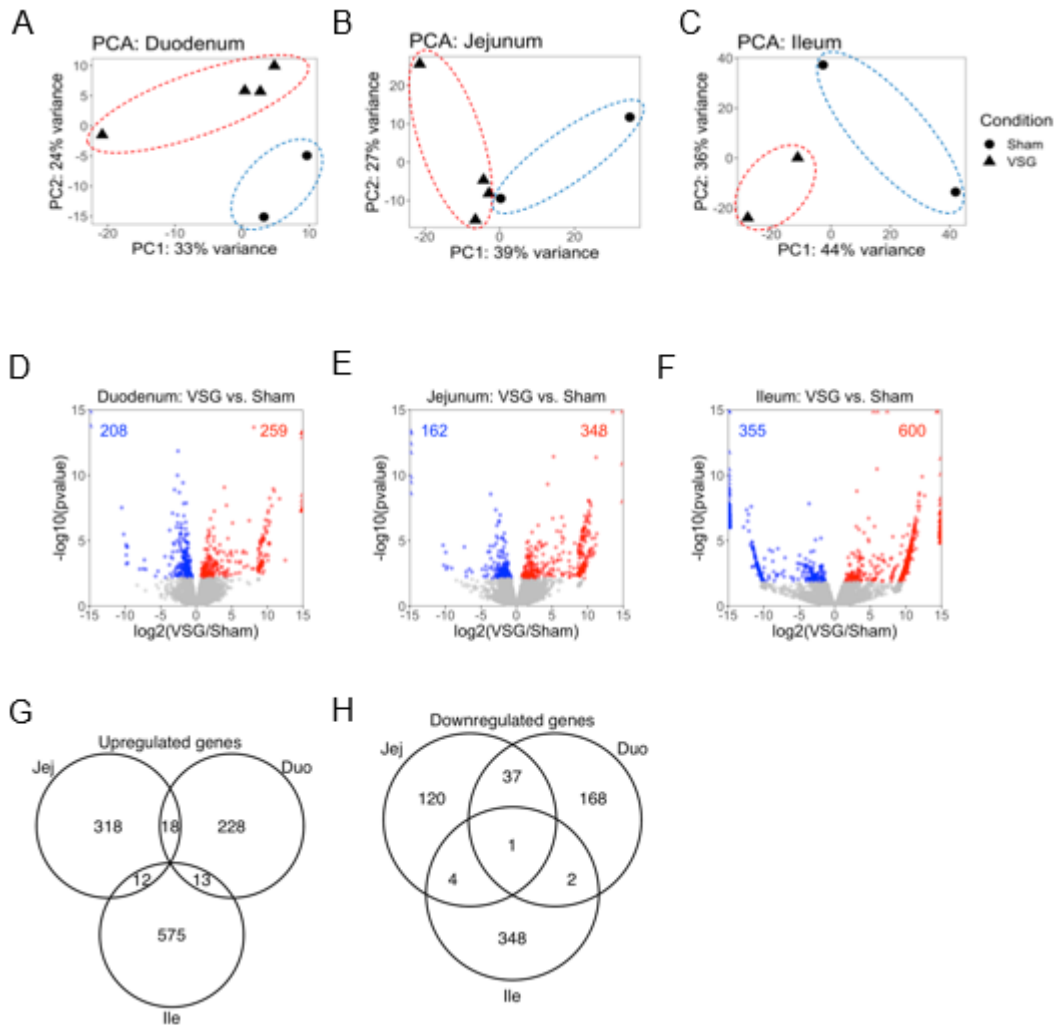

**Fig. S3.** Lgr5eGFP mice VSG-RNAseq results. (A-B) Venn diagram of up- (A) or downregulated (B) genes that are unique or shared across regional segments with VSG surgery compared to sham (upregulated genes defined by  $p$  value  $< 0.05$ , adjusted  $P < 0.2$ , normalized counts  $> 50$ ,  $\log_2$  fold change  $> 0.5$ ).  $n=2-4$  samples/surgery type for each regional segments. (C-E) Principal component analysis (PCA) of RNAseq data from duodenal (C), jejunal (D), or ileal (E) GFP<sup>+</sup> ISCs under sham and VSG surgery.  $n=2-4$  samples/surgery type for each regional segments. (F) Volcano plot of differentially expressed genes (348 up; 162 down) in jejunal GFP<sup>+</sup> ISCs under VSG relative to sham surgery ( $p$  value  $< 0.05$ ,  $p_{adj} < 0.2$ ,  $\log_2$  fold change  $> 0.5$ , and normalized counts  $> 50$ ). Dashed lines denote  $p$  value and  $\log_2$  fold change threshold ( $n=4$  in VSG and  $n=2$  in sham).

Supplementary Figure 4.

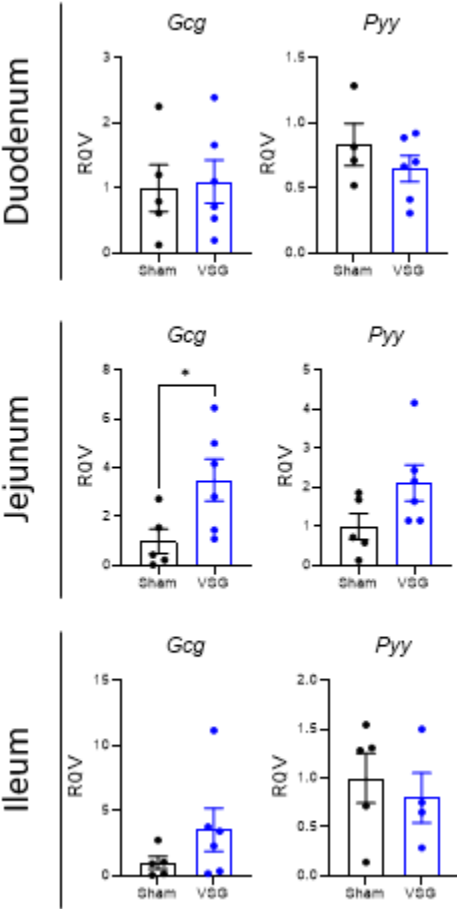

**Fig. S4.** qPCR validation of the RNaseq results. *Gcg* and *Pyy* gene expression from GFP<sup>+</sup> ISCs of the duodenum, jejunum, ileum of sham or VSG Lgr5eGFP mice. Statistics, *t*-test. \*P<0.05, n=5-6.

Supplementary Figure 5.

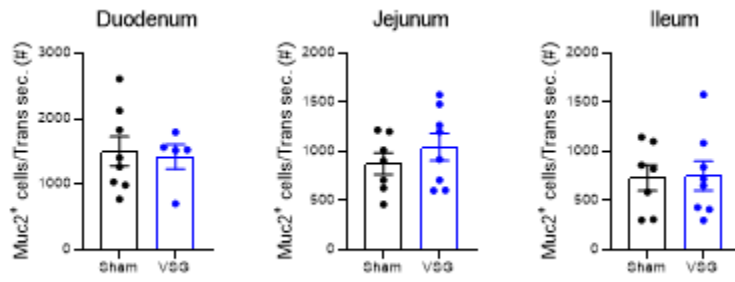

**Fig. S5.** The goblet cell number in the sham vs. VSG mouse intestine. (A-C) Muc2+ cell number of the intestinal transverse sections (sec.) of the duodenum (A), jejunum (B), or ileum (C). n=8.

Supplementary Figure 6.

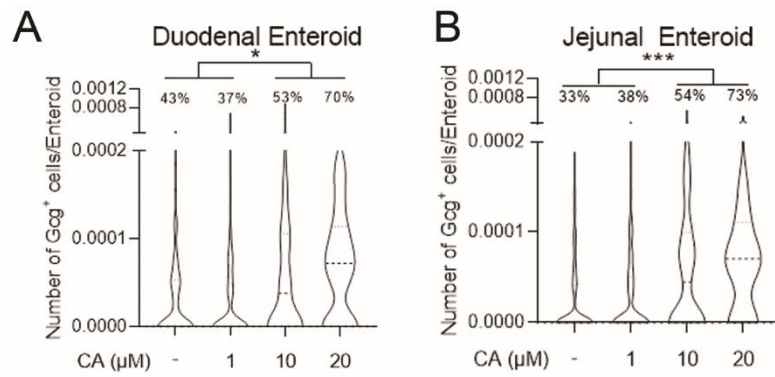

**Fig. S6.** Cholic acid (CA) treatment increases the number of enteroids containing GLP-1+ EECs in a dose-dependent manner. (A-B) Gcg-tomato mouse enteroids were exposure to the CA for 24 h. Violin plot of the individual enteroids (n=1000 enteroids/well) indicates median and quartiles (dotted lines). Numbers (%) above each violin plot indicate the proportion of the enteroids containing GLP-1+ EECs. Statistics, ANOVA. \*P<0.05, \*\*\*P<0.001.

Supplementary Figure 7.

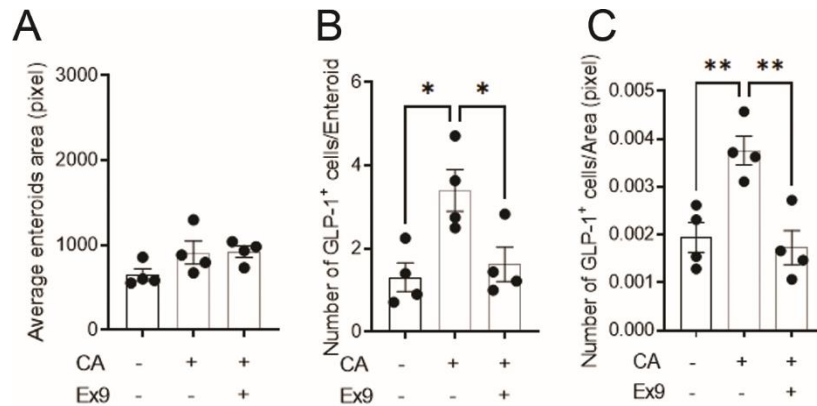

**Fig. S7.** Cholic acid (CA) treatment increases the number of enteroids containing GLP-1+ EECs in a GLP-1 receptor dependent manner. (A-C) Mouse enteroids were exposure to the CA alone or with a potent GLP-1 receptor antagonist, exendin 9-39 (Ex9) for 48 h, and the average enteroids area (A), GLP-1+ cell number per enteroids (B), and GLP-1+cell number per enteroid area (GLP-1+ cell density; C) were measured. n=4/group, each well contains 20 enteroids. Mean  $\pm$  SEM. Statistics, ANOVA. \*P<0.05, \*\*P<0.01.

Supplementary Figure 8.

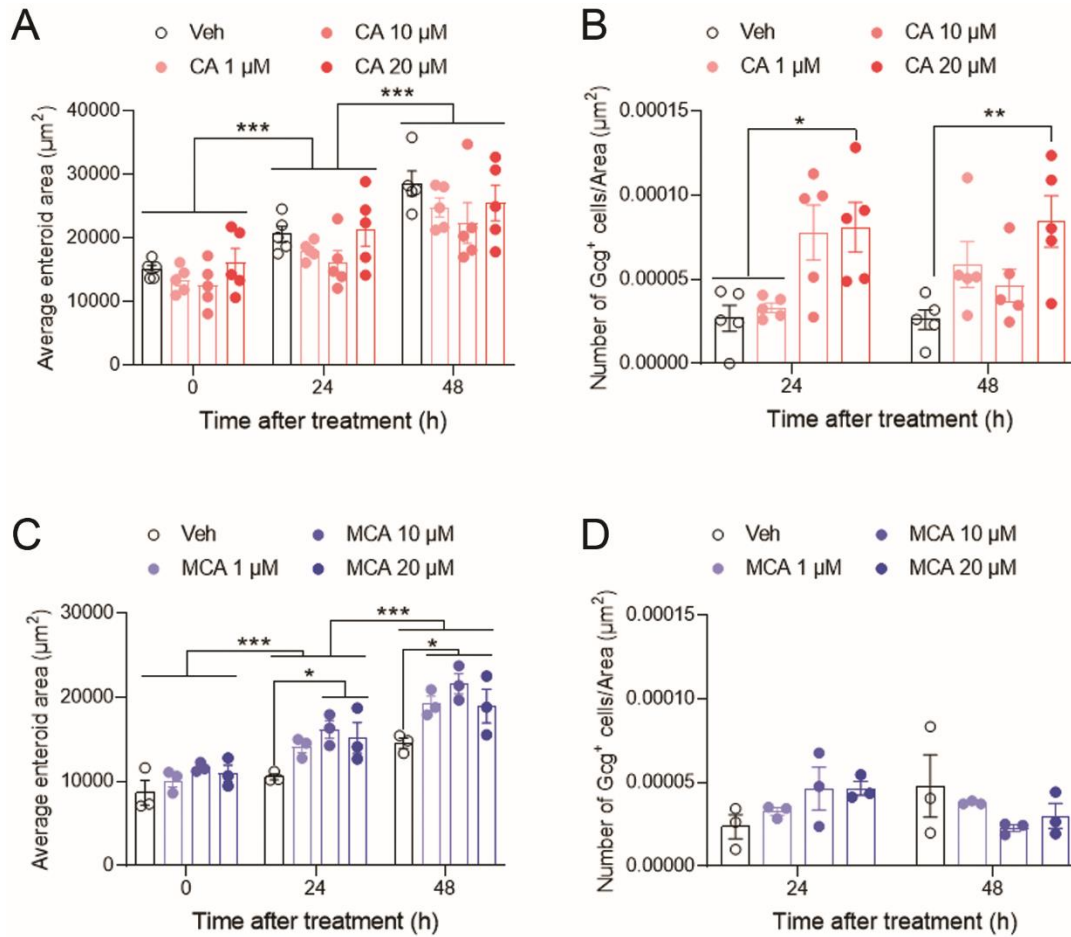

**Fig. S8.** Cholic acid (CA), but not muricholic acid (MCA) treatment increases the GLP-1+ EECs density. (A-B) CA treatment did not change the average enteroid area (A) while it significantly increased GLP-1+ cell density (B). (C-D) MCA treatment dose-dependently increased the average enteroid area (C) while it did not change the GLP-1+ cell density (D).  $n=3-5$ /group, each well contains 20 enteroids. Mean  $\pm$  SEM. Statistics, ANOVA. \* $P<0.05$ , \*\* $P<0.01$ , \*\*\* $P<0.001$ .
